# Supplementary material for: Understanding the Seasonal Effect of Metabolite Production in Terminalia catappa L. Leaves through a Concatenated MS- and NMR-Based Metabolomics Approach
Source: MDPI journal article supplement (doi:10.3390/metabo13030349), 2023-02-27
Supplement: s1 [file s1]

# Understanding the seasonal effect of metabolite production in *Terminalia catappa* L. leaves through a concatenated MS- and NMR-based metabolomics approach

Ana C. Zanatta <sup>1,2</sup>, Natália Carolina Vieira <sup>1</sup>, Renato Dantas-Medeiros <sup>3</sup>, Wagner Vilegas <sup>2</sup> and RuAngelie Edrada-Ebel <sup>4,\*</sup>

<sup>1</sup> Department of Biochemistry and Organic Chemistry, Institute of Chemistry, São Paulo State University (UNESP), 14800-060 Araraquara, São Paulo, Brazil;

<sup>2</sup> Institute of Biosciences, São Paulo State University (UNESP), 11380-972 São Vicente, São Paulo, Brazil

<sup>3</sup> Department of Pharmaceutical Sciences, Faculty of Pharmacy, Federal University of Rio Grande do Norte, 59012-570 Natal, Rio Grande do Norte, Brazil

<sup>4</sup> Strathclyde Institute of Pharmacy and Biomedical Sciences, University of Strathclyde, G4 0RE Glasgow, Scotland, United Kingdom

\* Correspondence: ruangelie.edrada-ebel@strath.ac.uk

## Supplementary Content

|                                                                                                                                                                                          |           |
|------------------------------------------------------------------------------------------------------------------------------------------------------------------------------------------|-----------|
| <b>Supplementary Figures .....</b>                                                                                                                                                       | <b>S2</b> |
| <b>Figure S1.</b> One-dimensional <i>J</i> -resolved NMR spectra (DMSO- <i>d</i> <sub>6</sub> , 500 MHz) of <i>Terminalia catappa</i> samples (Tc1 to Tc13) .....                        | S2        |
| <b>Figure S2.</b> Two-dimensional <i>J</i> -resolved NMR spectra (DMSO- <i>d</i> <sub>6</sub> , 500 MHz) of <i>Terminalia catappa</i> samples (Tc1 to Tc13) .....                        | S3        |
| <b>Figure S3.</b> Base peak chromatogram for <i>Terminalia catappa</i> samples obtained from pre-processing by MZmine2: (a) negative ionization mode; (b) positive ionization mode ..... | S4        |
| <b>Figure S4.</b> Permutation plot (n = 100 permutations) of PLS-DA validated model for <i>Terminalia catappa</i> : (a) NMR data; (b) MS data; (c) MS-NMR fused data .....               | S5        |
| <b>Figure S5.</b> Permutation plot (n = 100 permutations) of OPLS-DA validated model for <i>Terminalia catappa</i> : (a) MS-NMR fused data; (b) MS data .....                            | S6        |
| <b>Supplementary Tables.....</b>                                                                                                                                                         | <b>S7</b> |
| <b>Table S1.</b> Weather characteristics for Santos-SP in 2017 and 2018: average temperature, solar radiation, air humidity and rainfall.....                                            | S7        |

## Supplementary Figures

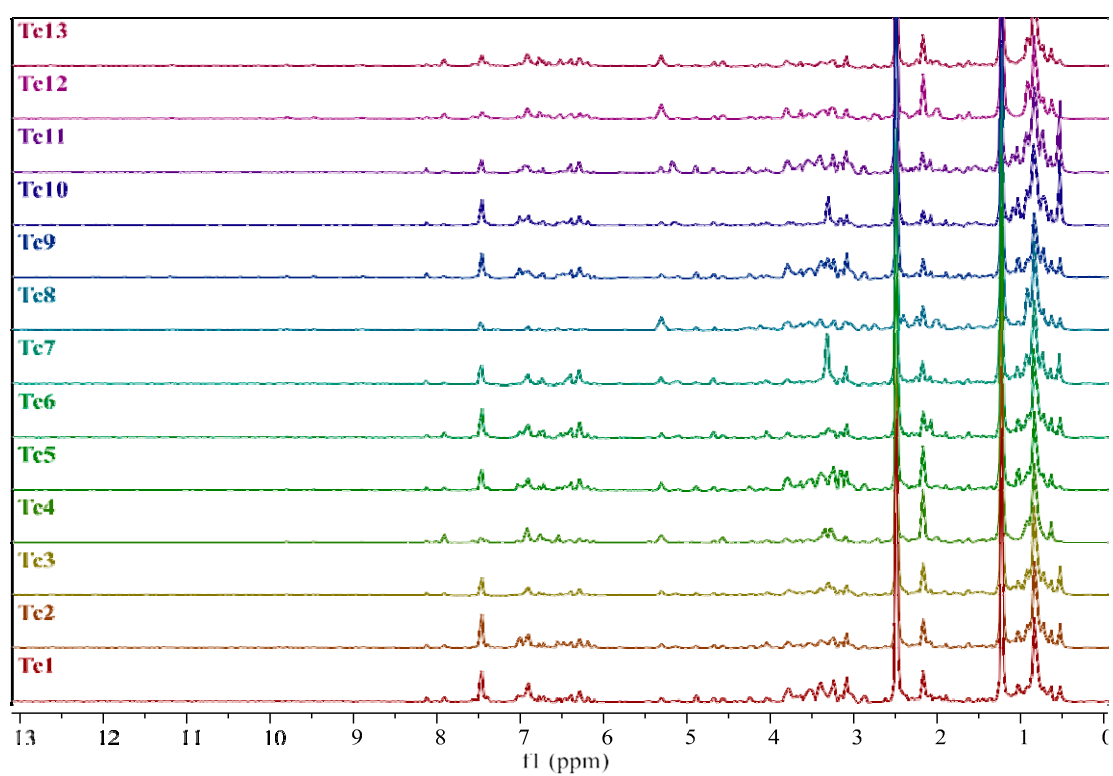

**Figure S1.** One-dimensional *J*-resolved NMR spectra (DMSO-*d*<sub>6</sub>, 500 MHz) of *Terminalia catappa* samples (Tc1 to Tc13).

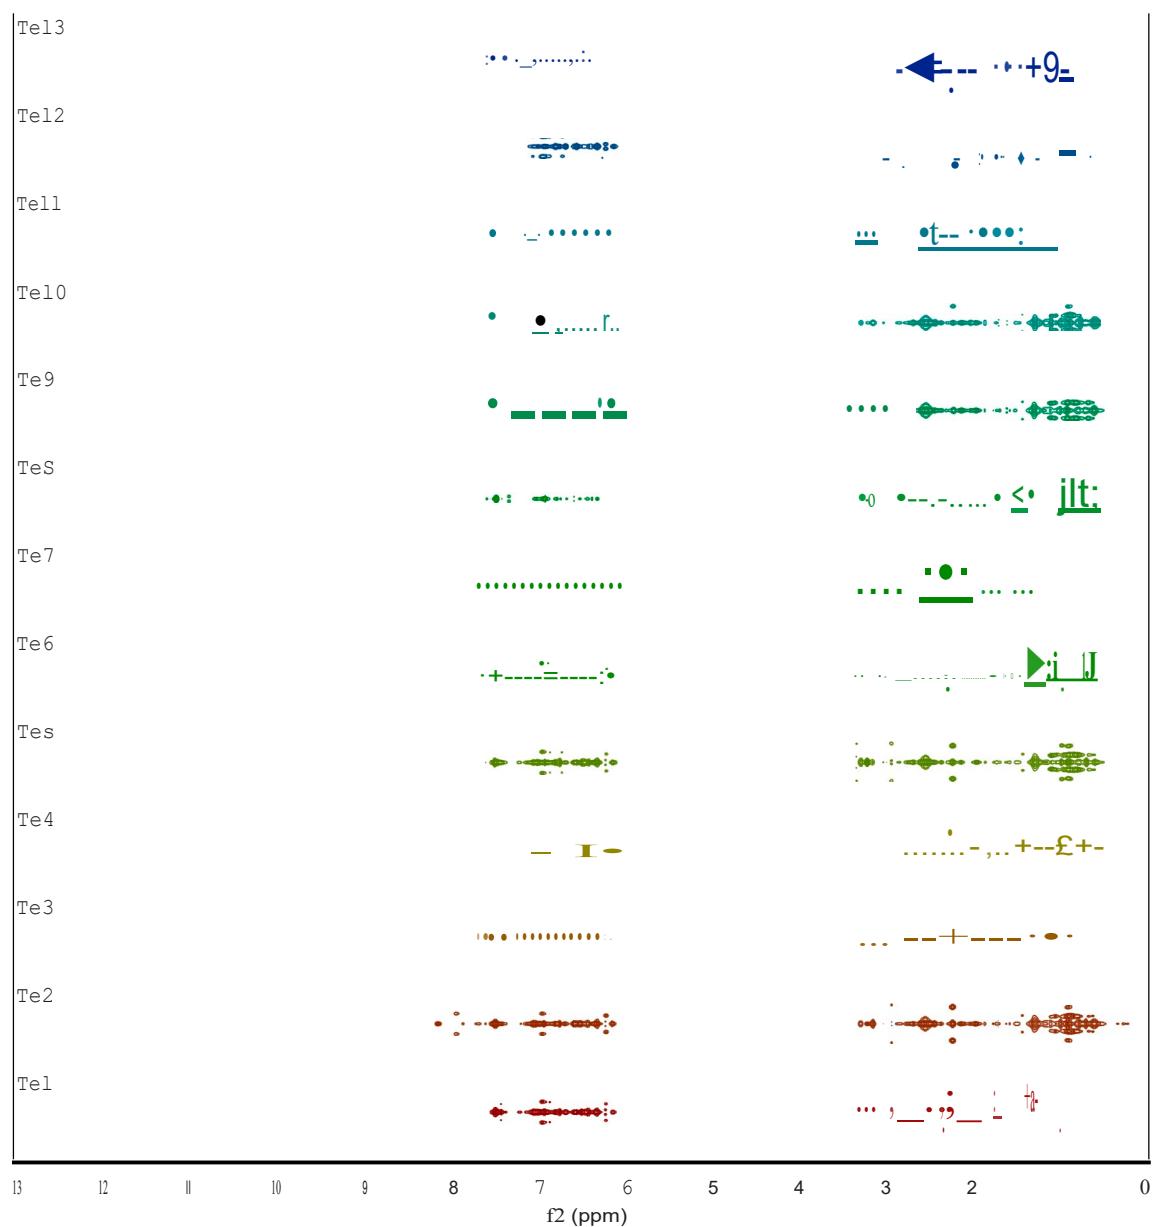

**Figure S2.** Two-dimensional  $J$ -resolved NMR spectra (DMSO- $d_6$ , 500 MHz) of *Terminalia catappa* samples (Tc1 to Tc13).

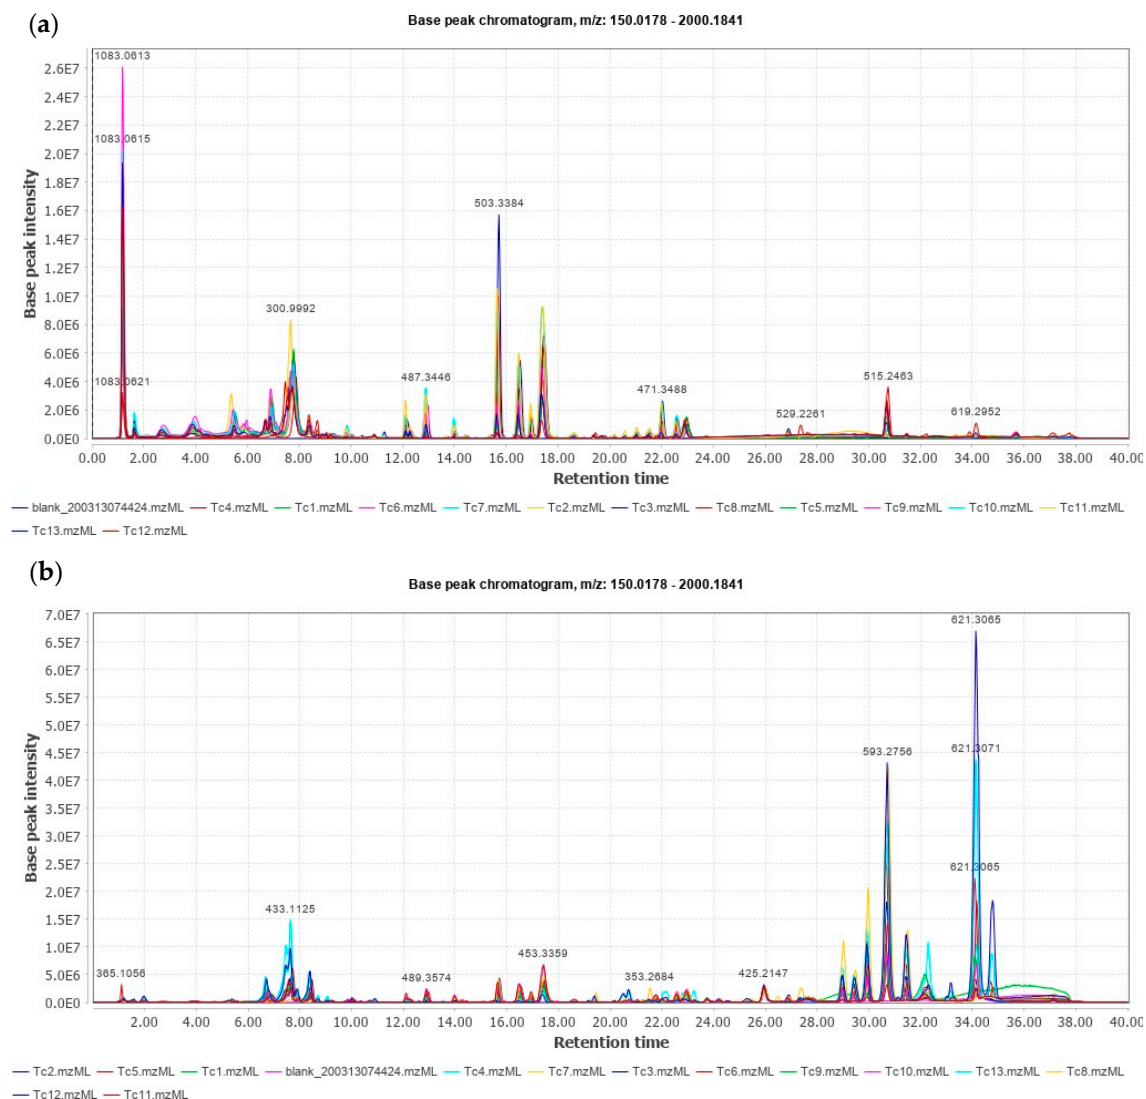

**Figure S3.** Base peak chromatogram for *Terminalia catappa* samples obtained from pre-processing by MZmine2: (a) negative ionization mode; (b) positive ionization mode.

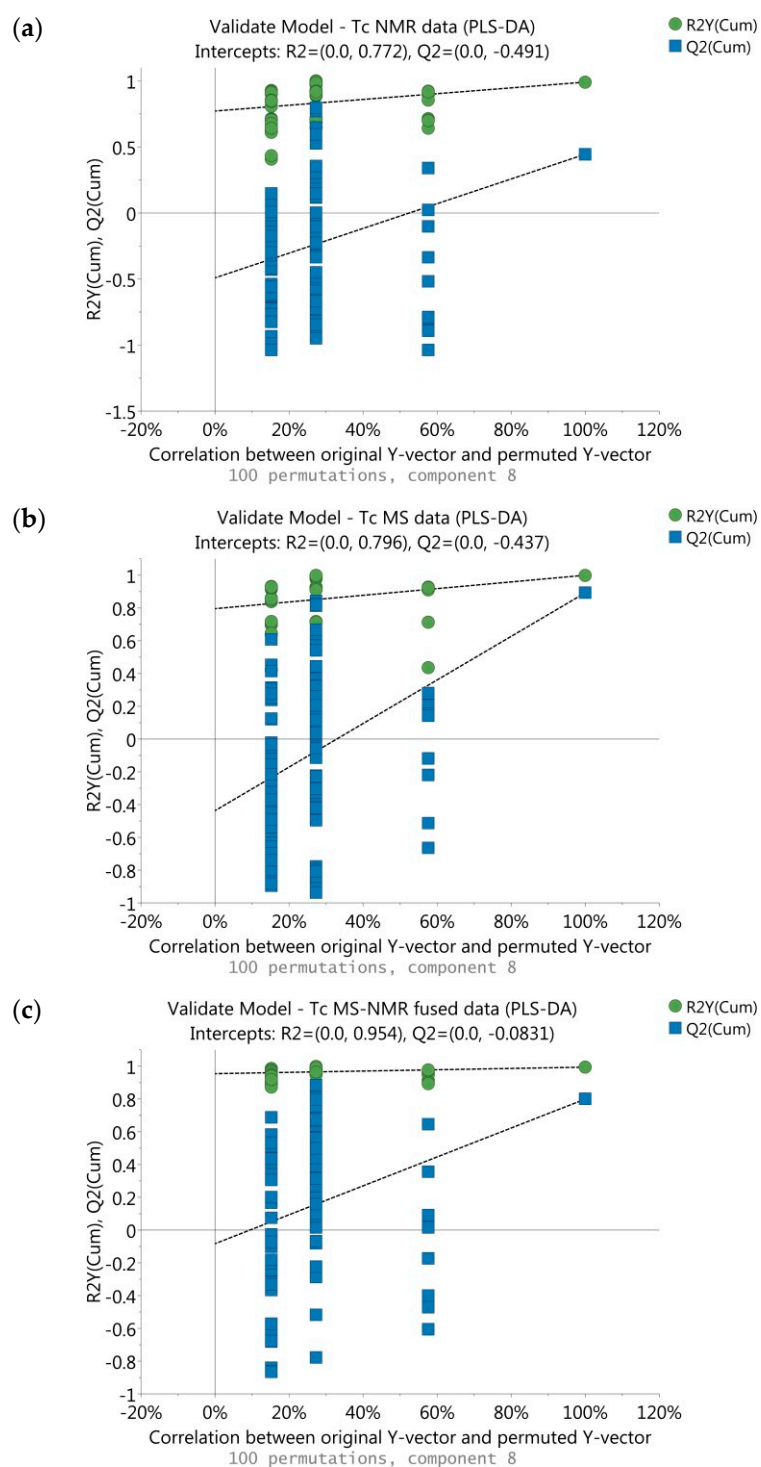

**Figure S4.** Permutation plot ( $n = 100$  permutations) of PLS-DA validated model for *Terminalia catappa*: (a) NMR data; (b) MS data; (c) MS-NMR fused data.

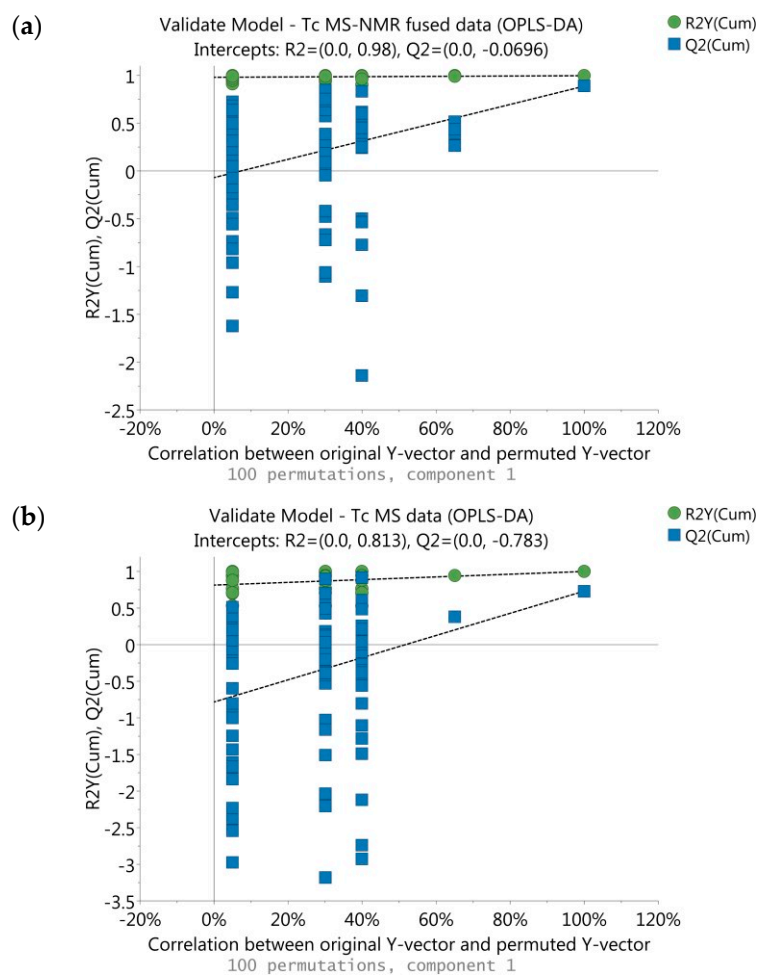

**Figure S5.** Permutation plot ( $n = 100$  permutations) of OPLS-DA validated model for *Terminalia catappa*: (a) MS-NMR fused data; (b) MS data.

## Supplementary Tables

**Table S1.** Weather characteristics for Santos-SP in 2017 and 2018: average temperature, solar radiation, air humidity and rainfall.

| Period | Average of temperature (°C) per month | Average of solar radiation (kJ/m <sup>2</sup> ) per month | Average relative air humidity (%) | Cumulative amount of rainfall (mm) per month |
|--------|---------------------------------------|-----------------------------------------------------------|-----------------------------------|----------------------------------------------|
| Feb/17 | 29.4                                  | 2503.34                                                   | 61                                | 0.10                                         |
| May/17 | 23.9                                  | 1551.68                                                   | 70                                | 0.19                                         |
| Jun/17 | 23.1                                  | 1324.92                                                   | 72                                | 0.26                                         |
| Aug/17 | 22.2                                  | 988.16                                                    | 66                                | 0.22                                         |
| Oct/17 | 24.7                                  | 1079.44                                                   | 75                                | 0.19                                         |
| Dec/17 | 25.2                                  | 771.04                                                    | 84                                | 0.43                                         |
| Feb/18 | 30.4                                  | 901.93                                                    | 75                                | 0.60                                         |
| Apr/18 | 27.4                                  | 931.46                                                    | 70                                | 0.38                                         |
| Jun/18 | 24.6                                  | 1504.56                                                   | 73                                | 0.20                                         |
| Jul/18 | 16.5                                  | 166.82                                                    | 96                                | 0.10                                         |
| Aug/18 | 21.4                                  | 782.68                                                    | 59                                | 0.10                                         |
| Oct/18 | 20.9                                  | 508.83                                                    | 95                                | 0.38                                         |
| Nov/18 | 26.3                                  | 903.74                                                    | 81                                | 0.41                                         |

\* The meteorological data were provided by the Meteorological Data Storage Section (SADMET) of the National Institute of Meteorology (INMET). Accessed at: [www.inmet.gov.br](http://www.inmet.gov.br).
